# Supplementary material for: Selective kinetic growth and role of local coordination in forming Al2TiO5-based coatings at lower temperatures
Source: Royal Society of Chemistry journal article supplement (doi:10.1039/d1ma00428j), 2021-01-01
Supplement: d1ma00428j1.pdf [file d1ma00428j1.pdf]

## Electronic supplementary information (ESI)

### Selective Kinetic Growth and Role of Local Coordination in Forming $\text{Al}_2\text{TiO}_5$ -based Coatings at Lower Temperatures

Sebastian Öhman,<sup>\*a</sup> Ren Qiu,<sup>b</sup> Tomas Edvinsson,<sup>c</sup> Olof Bäcke,<sup>b</sup> Tobias Törndahl,<sup>c</sup> Mats Boman<sup>a</sup>

#### Supplementary figures

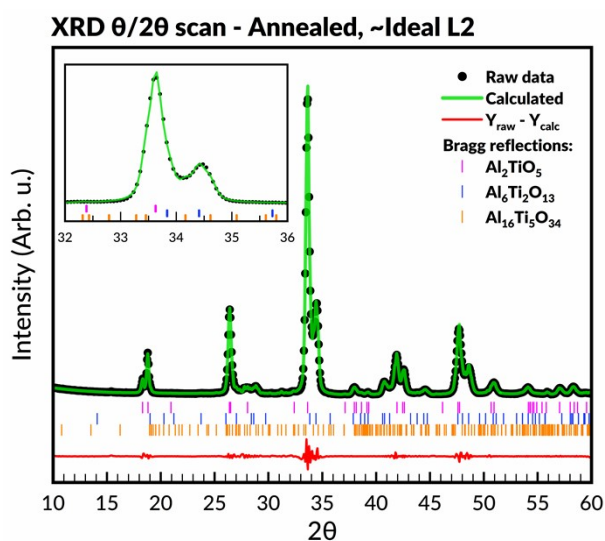

**Figure S1** –Pawley refined diffractogram of annealed batch L2, corresponding to a near-to-ideal Al:Ti composition (1.88) for  $\text{Al}_2\text{TiO}_5$ . Calculated green line from the presence of  $\text{Al}_2\text{TiO}_5$  and the two intergrowths  $\text{Al}_6\text{Ti}_2\text{O}_{13}$ ;  $\text{Al}_{16}\text{Ti}_5\text{O}_{34}$ . Bragg reflections marked for all three phases.

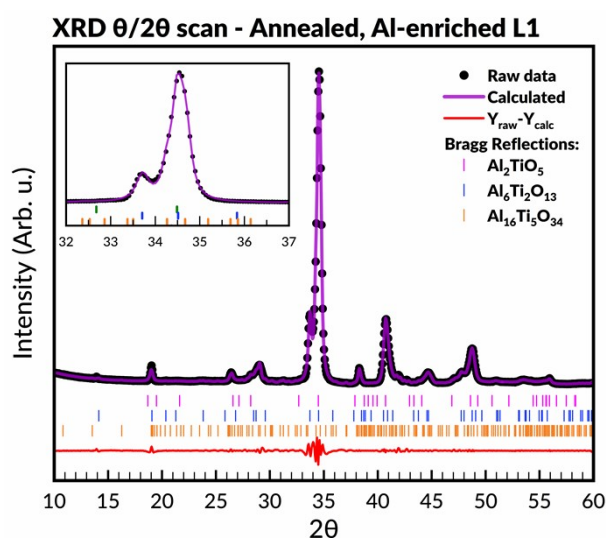

**Figure S2** Pawley refined diffractogram of Annealed batch L1, corresponding to an Al-enriched Al:Ti composition (3.29). Calculated purple line from the presence of  $\text{Al}_2\text{TiO}_5$  and the two intergrowths  $\text{Al}_6\text{Ti}_2\text{O}_{13}$ ;  $\text{Al}_{16}\text{Ti}_5\text{O}_{34}$ . Bragg reflections marked for all three phases.

**Structural reports and corresponding hkl values – L2 ideal composition**

<sup>a</sup> Inorganic Chemistry, Department of Chemistry – Ångström Laboratory, Uppsala University, Box 538, Uppsala SE-75121, Sweden

<sup>b</sup> Department of Physics, Chalmers University of Technology, Gothenburg SE-41296, Sweden

<sup>c</sup> Department of Materials Science and Engineering, Ångström Laboratory, Uppsala University, Box 35, Uppsala SE-75103, Sweden

\*Corresponding Author

**hkl Phase - 1 Pawley method**

|                               |                                  |
|-------------------------------|----------------------------------|
| Phase name                    | Al <sub>2</sub> TiO <sub>5</sub> |
| R-Bragg                       | 0.171                            |
| Spacegroup                    | Cmcm                             |
| Cell Volume (Å <sup>3</sup> ) | 328.65(18)                       |
| Lattice parameters            |                                  |
| a (Å)                         | 3.6003(18)                       |
| b (Å)                         | 9.4292(17)                       |
| c (Å)                         | 9.6809(11)                       |

| h | k | l | m | d       | Th2      | I         |
|---|---|---|---|---------|----------|-----------|
| 0 | 0 | 2 | 2 | 4.84046 | 18.31366 | 69(3)     |
| 0 | 2 | 0 | 2 | 4.71458 | 18.80702 | 217(9)    |
| 0 | 2 | 1 | 4 | 4.23866 | 20.94124 | 1(3)      |
| 0 | 2 | 2 | 4 | 3.37734 | 26.36794 | 680(170)  |
| 1 | 1 | 0 | 4 | 3.36348 | 26.47858 | 430(50)   |
| 1 | 1 | 1 | 8 | 3.17718 | 28.06204 | 60(30)    |
| 1 | 1 | 2 | 8 | 2.76211 | 32.38677 | 0(80)     |
| 0 | 2 | 3 | 4 | 2.66293 | 33.62822 | 5300(180) |
| 0 | 0 | 4 | 2 | 2.42023 | 37.11724 | 11(19)    |
| 1 | 3 | 0 | 4 | 2.36774 | 37.97115 | 0(4000)   |
| 0 | 4 | 0 | 2 | 2.35729 | 38.14602 | 0(5000)   |
| 1 | 1 | 3 | 8 | 2.32858 | 38.63494 | 8(20000)  |
| 1 | 3 | 1 | 8 | 2.29995 | 39.13525 | 8(2000)   |
| 0 | 4 | 1 | 4 | 2.29037 | 39.30573 | 0(1700)   |
| 0 | 2 | 4 | 4 | 2.15310 | 41.92568 | 1230(130) |
| 1 | 3 | 2 | 8 | 2.12692 | 42.46658 | 530(70)   |
| 0 | 4 | 2 | 4 | 2.11933 | 42.62601 | 550(60)   |
| 1 | 1 | 4 | 8 | 1.96451 | 46.17139 | 10(20)    |
| 1 | 3 | 3 | 8 | 1.90899 | 47.59557 | 3(700)    |
| 0 | 4 | 3 | 4 | 1.90350 | 47.74139 | 1580(180) |

|   |   |   |   |         |          |          |
|---|---|---|---|---------|----------|----------|
| 2 | 0 | 0 | 2 | 1.80016 | 50.66937 | 300(400) |
| 0 | 2 | 5 | 4 | 1.79103 | 50.94612 | 8(1200)  |
| 1 | 3 | 4 | 8 | 1.69250 | 54.14592 | 0(13000) |
| 0 | 4 | 4 | 4 | 1.68867 | 54.27881 | 0(18000) |
| 2 | 0 | 2 | 4 | 1.68726 | 54.32794 | 0(3000)  |
| 2 | 2 | 0 | 4 | 1.68174 | 54.52102 | 0(1700)  |
| 1 | 1 | 5 | 8 | 1.67802 | 54.65192 | 0(30000) |
| 1 | 5 | 0 | 4 | 1.67054 | 54.91719 | 0(400)   |
| 2 | 2 | 1 | 8 | 1.65692 | 55.40709 | 0(14000) |
| 1 | 5 | 1 | 8 | 1.64621 | 55.79902 | 0(6000)  |
| 0 | 0 | 6 | 2 | 1.61349 | 57.03304 | 310(150) |
| 2 | 2 | 2 | 8 | 1.58859 | 58.01110 | 0(1000)  |
| 1 | 5 | 2 | 8 | 1.57914 | 58.39162 | 0(2000)  |
| 0 | 6 | 0 | 2 | 1.57153 | 58.70208 | 0(8000)  |
| 0 | 6 | 1 | 4 | 1.55122 | 59.54737 | 0(4000)  |

---

Phase name  $\text{Al}_6\text{Ti}_2\text{O}_{13}$

R-Bragg 0.305

Spacegroup  $\text{Cm}2\text{m}$

Cell Volume ( $\text{\AA}^3$ ) 430.3(2)

Lattice parameters

a ( $\text{\AA}$ ) 3.6727(14)

b ( $\text{\AA}$ ) 9.331(3)

c ( $\text{\AA}$ ) 12.555(3)

| h | k | l | m | d       | Th2      | I         |
|---|---|---|---|---------|----------|-----------|
| 0 | 0 | 2 | 2 | 6.27734 | 14.09716 | 0.0(14)   |
| 0 | 2 | 0 | 2 | 4.66562 | 19.00620 | 0(70)     |
| 0 | 2 | 1 | 4 | 4.37339 | 20.28919 | 0(10)     |
| 0 | 0 | 3 | 2 | 4.18490 | 21.21339 | 0(4)      |
| 0 | 2 | 2 | 4 | 3.74460 | 23.74203 | 4(4)      |
| 1 | 1 | 0 | 4 | 3.41753 | 26.05232 | 0(40)     |
| 1 | 1 | 1 | 8 | 3.29754 | 27.01793 | 60(90)    |
| 0 | 0 | 4 | 2 | 3.13867 | 28.41351 | 19(13)    |
| 0 | 2 | 3 | 4 | 3.11531 | 28.63115 | 94(13)    |
| 1 | 1 | 2 | 8 | 3.00154 | 29.74092 | 7(7)      |
| 1 | 1 | 3 | 8 | 2.64703 | 33.83622 | 2010(150) |
| 0 | 2 | 4 | 4 | 2.60423 | 34.40950 | 2290(140) |
| 0 | 0 | 5 | 2 | 2.51094 | 35.73022 | 0(50)     |
| 1 | 3 | 0 | 4 | 2.37358 | 37.87425 | 200(400)  |
| 0 | 4 | 0 | 2 | 2.33281 | 38.56206 | 0(110000) |
| 1 | 3 | 1 | 8 | 2.33226 | 38.57146 | 0(110000) |
| 1 | 1 | 4 | 8 | 2.31168 | 38.92858 | 0(20000)  |
| 0 | 4 | 1 | 4 | 2.29355 | 39.24893 | 0(5000)   |
| 1 | 3 | 2 | 8 | 2.22017 | 40.60239 | 240(110)  |
| 0 | 2 | 5 | 4 | 2.21107 | 40.77685 | 400(300)  |
| 0 | 4 | 2 | 4 | 2.18670 | 41.25193 | 200(400)  |

|   |   |   |   |         |          |            |
|---|---|---|---|---------|----------|------------|
| 0 | 0 | 6 | 2 | 2.09245 | 43.20098 | 90(40)     |
| 1 | 3 | 3 | 8 | 2.06461 | 43.81332 | 110(20)    |
| 0 | 4 | 3 | 4 | 2.03761 | 44.42456 | 200(50)    |
| 1 | 1 | 5 | 8 | 2.02349 | 44.75133 | 90(190)    |
| 0 | 2 | 6 | 4 | 1.90923 | 47.58930 | 3100(1000) |
| 1 | 3 | 4 | 8 | 1.89318 | 48.01805 | 1(500)     |
| 0 | 4 | 4 | 4 | 1.87230 | 48.58793 | 1800(300)  |
| 2 | 0 | 0 | 2 | 1.83636 | 49.60224 | 0(400)     |
| 2 | 0 | 1 | 4 | 1.81703 | 50.16632 | 0(120)     |
| 0 | 0 | 7 | 2 | 1.79353 | 50.87013 | 500(500)   |
| 1 | 1 | 6 | 8 | 1.78453 | 51.14510 | 150(130)   |
| 2 | 0 | 2 | 4 | 1.76249 | 51.83165 | 0(60)      |
| 1 | 3 | 5 | 8 | 1.72489 | 53.04872 | 0(300)     |
| 0 | 4 | 5 | 4 | 1.70905 | 53.57934 | 0(50000)   |
| 2 | 2 | 0 | 4 | 1.70877 | 53.58899 | 0(60000)   |
| 2 | 2 | 1 | 8 | 1.69316 | 54.12318 | 0(12000)   |
| 2 | 0 | 3 | 4 | 1.68159 | 54.52629 | 0(3000)    |
| 0 | 2 | 7 | 4 | 1.67409 | 54.79079 | 0(2000)    |
| 1 | 5 | 0 | 4 | 1.66377 | 55.15952 | 0(700)     |
| 1 | 5 | 1 | 8 | 1.64935 | 55.68346 | 0(110000)  |
| 2 | 2 | 2 | 8 | 1.64877 | 55.70475 | 1(120000)  |
| 1 | 5 | 2 | 8 | 1.60824 | 57.23616 | 300(700)   |
| 1 | 1 | 7 | 8 | 1.58811 | 58.03010 | 0(2000)    |
| 2 | 0 | 4 | 4 | 1.58501 | 58.15477 | 200(1700)  |
| 2 | 2 | 3 | 8 | 1.58197 | 58.27703 | 600(1800)  |
| 1 | 3 | 6 | 8 | 1.56962 | 58.78057 | 0(9000)    |
| 0 | 0 | 8 | 2 | 1.56934 | 58.79205 | 0(7000)    |
| 0 | 4 | 6 | 4 | 1.55765 | 59.27684 | 200(1000)  |
| 0 | 6 | 0 | 2 | 1.55521 | 59.37944 | 100(1200)  |
| 1 | 5 | 3 | 8 | 1.54607 | 59.76600 | 0(400000)  |

---

**hkl Phase - 3 Pawley method**

|            |                                                  |
|------------|--------------------------------------------------|
| Phase name | Al <sub>16</sub> Ti <sub>5</sub> O <sub>34</sub> |
| R-Bragg    | 0.193                                            |
| Spacegroup | Cmcm                                             |

|                               |           |
|-------------------------------|-----------|
| Cell Volume (Å <sup>3</sup> ) | 2234.0(7) |
|-------------------------------|-----------|

## Lattice parameters

|       |            |
|-------|------------|
| a (Å) | 3.6723(8)  |
| b (Å) | 9.2883(18) |
| c (Å) | 65.494(10) |

| h | k | l  | m | d       | Th2      | I       |
|---|---|----|---|---------|----------|---------|
| 0 | 0 | 8  | 2 | 8.18676 | 10.79798 | 0.0(8)  |
| 0 | 0 | 10 | 2 | 6.54941 | 13.50877 | 0.0(10) |
| 0 | 0 | 12 | 2 | 5.45784 | 16.22718 | 0.5(13) |
| 0 | 0 | 14 | 2 | 4.67815 | 18.95483 | 2(40)   |
| 0 | 2 | 0  | 2 | 4.64413 | 19.09494 | 9(30)   |
| 0 | 2 | 1  | 4 | 4.63250 | 19.14334 | 0(9)    |
| 0 | 2 | 2  | 4 | 4.59812 | 19.28782 | 0(5)    |
| 0 | 2 | 3  | 4 | 4.54249 | 19.52635 | 0(2)    |
| 0 | 2 | 4  | 4 | 4.46789 | 19.85566 | 0(2)    |
| 0 | 2 | 5  | 4 | 4.37716 | 20.27151 | 0(8)    |
| 0 | 2 | 6  | 4 | 4.27344 | 20.76893 | 0(2)    |
| 0 | 2 | 7  | 4 | 4.15987 | 21.34250 | 0(3)    |
| 0 | 0 | 16 | 2 | 4.09338 | 21.69335 | 0(2)    |
| 0 | 2 | 8  | 4 | 4.03945 | 21.98656 | 0(2)    |
| 0 | 2 | 9  | 4 | 3.91485 | 22.69549 | 0(3)    |
| 0 | 2 | 10 | 4 | 3.78837 | 23.46378 | 0(3)    |
| 0 | 2 | 11 | 4 | 3.66191 | 24.28623 | 1(3)    |
| 0 | 0 | 18 | 2 | 3.63856 | 24.44448 | 0(3)    |

|   |   |    |   |         |          |           |
|---|---|----|---|---------|----------|-----------|
| 0 | 2 | 12 | 4 | 3.53696 | 25.15799 | 4(3)      |
| 1 | 1 | 0  | 4 | 3.41508 | 26.07140 | 0(10000)  |
| 0 | 2 | 13 | 4 | 3.41466 | 26.07460 | 0(10000)  |
| 1 | 1 | 1  | 8 | 3.41044 | 26.10744 | 0(1100)   |
| 1 | 1 | 2  | 8 | 3.39665 | 26.21530 | 130(70)   |
| 1 | 1 | 3  | 8 | 3.37404 | 26.39415 | 0(180)    |
| 1 | 1 | 4  | 8 | 3.34313 | 26.64267 | 123(18)   |
| 1 | 1 | 5  | 8 | 3.30461 | 26.95907 | 0(40)     |
| 0 | 2 | 14 | 4 | 3.29586 | 27.03201 | 6(30)     |
| 0 | 0 | 20 | 2 | 3.27470 | 27.20999 | 0(13)     |
| 1 | 1 | 6  | 8 | 3.25929 | 27.34118 | 31(6)     |
| 1 | 1 | 7  | 8 | 3.20806 | 27.78650 | 69(6)     |
| 0 | 2 | 15 | 4 | 3.18112 | 28.02658 | 20(30)    |
| 1 | 1 | 8  | 8 | 3.15184 | 28.29231 | 38(9)     |
| 1 | 1 | 9  | 8 | 3.09157 | 28.85572 | 73(8)     |
| 0 | 2 | 16 | 4 | 3.07081 | 29.05508 | 42(6)     |
| 1 | 1 | 10 | 8 | 3.02813 | 29.47375 | 6(5)      |
| 0 | 0 | 22 | 2 | 2.97700 | 29.99175 | 2(9)      |
| 0 | 2 | 17 | 4 | 2.96514 | 30.11460 | 0(30)     |
| 1 | 1 | 11 | 8 | 2.96237 | 30.14339 | 9(30)     |
| 1 | 1 | 12 | 8 | 2.89504 | 30.86167 | 8(5)      |
| 0 | 2 | 18 | 4 | 2.86418 | 31.20263 | 31(6)     |
| 1 | 1 | 13 | 8 | 2.82682 | 31.62570 | 10(6)     |
| 0 | 2 | 19 | 4 | 2.76792 | 32.31690 | 20(30)    |
| 1 | 1 | 14 | 8 | 2.75830 | 32.43269 | 0(50)     |
| 0 | 0 | 24 | 2 | 2.72892 | 32.79173 | 0(7)      |
| 1 | 1 | 15 | 8 | 2.68999 | 33.28000 | 0(40)     |
| 0 | 2 | 20 | 4 | 2.67628 | 33.45547 | 1620(130) |
| 1 | 1 | 16 | 8 | 2.62230 | 34.16513 | 480(70)   |
| 0 | 2 | 21 | 4 | 2.58912 | 34.61663 | 590(70)   |
| 1 | 1 | 17 | 8 | 2.55557 | 35.08574 | 0(10)     |

|   |   |    |   |         |          |          |
|---|---|----|---|---------|----------|----------|
| 0 | 0 | 26 | 2 | 2.51900 | 35.61198 | 0(20)    |
| 0 | 2 | 22 | 4 | 2.50628 | 35.79889 | 3(30)    |
| 1 | 1 | 18 | 8 | 2.49008 | 36.03968 | 1(8)     |
| 0 | 2 | 23 | 4 | 2.42757 | 37.00095 | 7(50)    |
| 1 | 1 | 19 | 8 | 2.42605 | 37.02494 | 0(60)    |
| 1 | 3 | 0  | 4 | 2.36708 | 37.98214 | 0(10000) |
| 1 | 3 | 1  | 8 | 2.36554 | 38.00788 | 0(13000) |
| 1 | 1 | 20 | 8 | 2.36363 | 38.03972 | 9(2000)  |
| 1 | 3 | 2  | 8 | 2.36092 | 38.08504 | 0(6000)  |
| 1 | 3 | 3  | 8 | 2.35329 | 38.21335 | 3(13000) |
| 0 | 2 | 24 | 4 | 2.35280 | 38.22170 | 0(16000) |
| 1 | 3 | 4  | 8 | 2.34273 | 38.39237 | 20(60)   |
| 0 | 0 | 28 | 2 | 2.33907 | 38.45472 | 0(1100)  |
| 1 | 3 | 5  | 8 | 2.32936 | 38.62151 | 0(17000) |
| 0 | 4 | 0  | 2 | 2.32207 | 38.74755 | 0(18000) |
| 0 | 4 | 1  | 4 | 2.32061 | 38.77287 | 6(20000) |
| 0 | 4 | 2  | 4 | 2.31625 | 38.84875 | 0(5000)  |
| 1 | 3 | 6  | 8 | 2.31332 | 38.90002 | 0(5000)  |
| 0 | 4 | 3  | 4 | 2.30904 | 38.97493 | 0(9000)  |
| 1 | 1 | 21 | 8 | 2.30294 | 39.08234 | 0(1100)  |
| 0 | 4 | 4  | 4 | 2.29906 | 39.15100 | 0(2000)  |
| 1 | 3 | 7  | 8 | 2.29478 | 39.22701 | 1(90)    |
| 0 | 4 | 5  | 4 | 2.28642 | 39.37642 | 1(1000)  |
| 0 | 2 | 25 | 4 | 2.28176 | 39.46019 | 5(130)   |
| 1 | 3 | 8  | 8 | 2.27394 | 39.60150 | 10(50)   |
| 0 | 4 | 6  | 4 | 2.27125 | 39.65046 | 0(40)    |
| 0 | 4 | 7  | 4 | 2.25370 | 39.97231 | 10(50)   |
| 1 | 3 | 9  | 8 | 2.25099 | 40.02238 | 0(40)    |
| 1 | 1 | 22 | 8 | 2.24406 | 40.15129 | 1(17)    |
| 0 | 4 | 8  | 4 | 2.23395 | 40.34102 | 1(20)    |
| 1 | 3 | 10 | 8 | 2.22615 | 40.48845 | 10(40)   |



|   |   |    |   |         |          |         |
|---|---|----|---|---------|----------|---------|
| 0 | 2 | 26 | 4 | 2.21425 | 40.71560 | 0(300)  |
| 0 | 4 | 9  | 4 | 2.21218 | 40.75554 | 10(140) |
| 1 | 3 | 11 | 8 | 2.19963 | 40.99848 | 140(60) |
| 0 | 4 | 10 | 4 | 2.18858 | 41.21474 | 0(190)  |
| 1 | 1 | 23 | 8 | 2.18704 | 41.24522 | 60(130) |
| 0 | 0 | 30 | 2 | 2.18314 | 41.32227 | 0(130)  |
| 1 | 3 | 12 | 8 | 2.17164 | 41.55115 | 600(50) |
| 0 | 4 | 11 | 4 | 2.16336 | 41.71745 | 160(40) |
| 0 | 2 | 27 | 4 | 2.15009 | 41.98723 | 0(120)  |
| 1 | 3 | 13 | 8 | 2.14239 | 42.14514 | 20(60)  |
| 0 | 4 | 12 | 4 | 2.13672 | 42.26241 | 210(50) |
| 1 | 1 | 24 | 8 | 2.13188 | 42.36289 | 120(90) |
| 1 | 3 | 14 | 8 | 2.11210 | 42.77910 | 110(50) |
| 0 | 4 | 13 | 4 | 2.10885 | 42.84837 | 10(60)  |
| 0 | 2 | 28 | 4 | 2.08906 | 43.27452 | 0(40)   |
| 1 | 3 | 15 | 8 | 2.08095 | 43.45169 | 0(1700) |
| 0 | 4 | 14 | 4 | 2.07994 | 43.47404 | 0(1000) |
| 1 | 1 | 25 | 8 | 2.07861 | 43.50322 | 0(700)  |
| 0 | 4 | 15 | 4 | 2.05017 | 44.13812 | 50(110) |
| 1 | 3 | 16 | 8 | 2.04914 | 44.16156 | 0(140)  |
| 0 | 0 | 32 | 2 | 2.04669 | 44.21715 | 10(60)  |
| 0 | 2 | 29 | 4 | 2.03100 | 44.57697 | 60(50)  |
| 1 | 1 | 26 | 8 | 2.02719 | 44.66524 | 0(90)   |
| 0 | 4 | 16 | 4 | 2.01972 | 44.83934 | 30(100) |
| 1 | 3 | 17 | 8 | 2.01682 | 44.90742 | 30(40)  |
| 0 | 4 | 17 | 4 | 1.98876 | 45.57645 | 20(20)  |
| 1 | 3 | 18 | 8 | 1.98416 | 45.68798 | 0(30)   |
| 1 | 1 | 27 | 8 | 1.97761 | 45.84809 | 5(50)   |
| 0 | 2 | 30 | 4 | 1.97573 | 45.89421 | 7(60)   |
| 0 | 4 | 18 | 4 | 1.95742 | 46.34821 | 0(19)   |
| 1 | 3 | 19 | 8 | 1.95131 | 46.50202 | 0(19)   |

|   |   |    |   |         |          |          |
|---|---|----|---|---------|----------|----------|
| 1 | 1 | 28 | 8 | 1.92981 | 47.05101 | 0(1000)  |
| 0 | 0 | 34 | 2 | 1.92630 | 47.14206 | 0(40)    |
| 0 | 4 | 19 | 4 | 1.92586 | 47.15342 | 0(900)   |
| 0 | 2 | 31 | 4 | 1.92307 | 47.22593 | 0(200)   |
| 1 | 3 | 20 | 8 | 1.91838 | 47.34834 | 320(120) |
| 0 | 4 | 20 | 4 | 1.89419 | 47.99096 | 700(400) |
| 1 | 3 | 21 | 8 | 1.88551 | 48.22583 | 0(190)   |
| 1 | 1 | 29 | 8 | 1.88376 | 48.27336 | 550(160) |
| 0 | 2 | 32 | 4 | 1.87288 | 48.57190 | 0(300)   |
| 0 | 4 | 21 | 4 | 1.86252 | 48.85971 | 310(50)  |
| 1 | 3 | 22 | 8 | 1.85278 | 49.13340 | 30(30)   |
| 1 | 1 | 30 | 8 | 1.83941 | 49.51458 | 0(100)   |
| 2 | 0 | 0  | 2 | 1.83615 | 49.60823 | 10(70)   |
| 2 | 0 | 2  | 4 | 1.83327 | 49.69143 | 0(600)   |
| 0 | 4 | 22 | 4 | 1.83095 | 49.75866 | 7(160)   |
| 0 | 2 | 33 | 4 | 1.82500 | 49.93196 | 4(90)    |
| 2 | 0 | 4  | 4 | 1.82472 | 49.94041 | 30(160)  |
| 1 | 3 | 23 | 8 | 1.82029 | 50.07006 | 0(170)   |
| 0 | 0 | 36 | 2 | 1.81928 | 50.09991 | 0(600)   |
| 2 | 0 | 6  | 4 | 1.81071 | 50.35338 | 0(300)   |
| 0 | 4 | 23 | 4 | 1.79958 | 50.68681 | 120(40)  |
| 1 | 1 | 31 | 8 | 1.79669 | 50.77418 | 0(170)   |
| 2 | 0 | 8  | 4 | 1.79164 | 50.92742 | 200(300) |
| 1 | 3 | 24 | 8 | 1.78812 | 51.03485 | 0(1100)  |
| 0 | 2 | 34 | 4 | 1.77931 | 51.30601 | 50(50)   |
| 0 | 4 | 24 | 4 | 1.76848 | 51.64325 | 0(200)   |
| 2 | 0 | 10 | 4 | 1.76799 | 51.65870 | 0(300)   |
| 1 | 3 | 25 | 8 | 1.75634 | 52.02692 | 2(130)   |
| 1 | 1 | 32 | 8 | 1.75556 | 52.05179 | 0(130)   |
| 2 | 0 | 12 | 4 | 1.74031 | 52.54258 | 0(90)    |
| 0 | 4 | 25 | 4 | 1.73771 | 52.62712 | 0(70)    |

|   |   |    |   |         |          |            |
|---|---|----|---|---------|----------|------------|
| 0 | 2 | 35 | 4 | 1.73566 | 52.69402 | 0(60)      |
| 1 | 3 | 26 | 8 | 1.72499 | 53.04543 | 0(190)     |
| 0 | 0 | 38 | 2 | 1.72353 | 53.09390 | 7(80)      |
| 1 | 1 | 33 | 8 | 1.71594 | 53.34708 | 30(180)    |
| 2 | 0 | 14 | 4 | 1.70921 | 53.57390 | 0(5000)    |
| 2 | 2 | 0  | 4 | 1.70754 | 53.63065 | 0(800)     |
| 0 | 4 | 26 | 4 | 1.70733 | 53.63763 | 0(4000)    |
| 2 | 2 | 1  | 8 | 1.70696 | 53.65033 | 9(1700)    |
| 2 | 2 | 2  | 8 | 1.70522 | 53.70935 | 0(1000)    |
| 2 | 2 | 3  | 8 | 1.70234 | 53.80762 | 0(60000)   |
| 2 | 2 | 4  | 8 | 1.69833 | 53.94499 | 0(50000)   |
| 1 | 3 | 27 | 8 | 1.69413 | 54.08965 | 0(500)     |
| 0 | 2 | 36 | 4 | 1.69394 | 54.09602 | 200(400)   |
| 2 | 2 | 5  | 8 | 1.69321 | 54.12125 | 0(4000)    |
| 2 | 2 | 6  | 8 | 1.68702 | 54.33616 | 0(9000)    |
| 2 | 2 | 7  | 8 | 1.67979 | 54.58940 | 0(13000)   |
| 1 | 1 | 34 | 8 | 1.67780 | 54.65980 | 7(30000)   |
| 0 | 4 | 27 | 4 | 1.67739 | 54.67404 | 0(3000)    |
| 2 | 0 | 16 | 4 | 1.67532 | 54.74714 | 0(1300)    |
| 2 | 2 | 8  | 8 | 1.67157 | 54.88061 | 0(200)     |
| 1 | 3 | 28 | 8 | 1.66379 | 55.15889 | 0(300)     |
| 2 | 2 | 9  | 8 | 1.66239 | 55.20939 | 0(6000)    |
| 1 | 5 | 0  | 4 | 1.65764 | 55.38120 | 0(3000)    |
| 1 | 5 | 1  | 8 | 1.65711 | 55.40045 | 0(50000)   |
| 1 | 5 | 2  | 8 | 1.65552 | 55.45821 | 0(1300000) |
| 0 | 2 | 37 | 4 | 1.65404 | 55.51207 | 6(500000)  |
| 1 | 5 | 3  | 8 | 1.65288 | 55.55437 | 0(200)     |
| 2 | 2 | 10 | 8 | 1.65230 | 55.57531 | 0(15000)   |
| 1 | 5 | 4  | 8 | 1.64921 | 55.68881 | 0(12000)   |
| 0 | 4 | 28 | 4 | 1.64793 | 55.73571 | 0(4000)    |
| 1 | 5 | 5  | 8 | 1.64452 | 55.86135 | 0(900000)  |

|   |   |    |   |         |          |             |
|---|---|----|---|---------|----------|-------------|
| 2 | 2 | 11 | 8 | 1.64137 | 55.97790 | 0(3000)     |
| 1 | 1 | 35 | 8 | 1.64105 | 55.98979 | 0(8000)     |
| 2 | 0 | 18 | 4 | 1.63925 | 56.05663 | 0(1100)     |
| 1 | 5 | 6  | 8 | 1.63885 | 56.07176 | 0(300)      |
| 0 | 0 | 40 | 2 | 1.63735 | 56.12749 | 0(700)      |
| 1 | 3 | 29 | 8 | 1.63401 | 56.25256 | 0(10000)    |
| 1 | 5 | 7  | 8 | 1.63222 | 56.31975 | 0(3000)     |
| 2 | 2 | 12 | 8 | 1.62964 | 56.41665 | 0(300)      |
| 1 | 5 | 8  | 8 | 1.62467 | 56.60501 | 130(140)    |
| 0 | 4 | 29 | 4 | 1.61898 | 56.82202 | 0(200)      |
| 2 | 2 | 13 | 8 | 1.61718 | 56.89104 | 0(90000)    |
| 1 | 5 | 9  | 8 | 1.61624 | 56.92718 | 0(70000)    |
| 0 | 2 | 38 | 4 | 1.61584 | 56.94231 | 0(1500)     |
| 1 | 5 | 10 | 8 | 1.60697 | 57.28585 | 5(30000)    |
| 1 | 1 | 36 | 8 | 1.60566 | 57.33693 | 0(3000)     |
| 1 | 3 | 30 | 8 | 1.60481 | 57.37011 | 0(3000)     |
| 2 | 2 | 14 | 8 | 1.60403 | 57.40051 | 60(180)     |
| 2 | 0 | 20 | 4 | 1.60157 | 57.49677 | 0(900)      |
| 1 | 5 | 11 | 8 | 1.59690 | 57.68062 | 0(1800)     |
| 0 | 4 | 30 | 4 | 1.59056 | 57.93245 | 40(140)     |
| 2 | 2 | 15 | 8 | 1.59026 | 57.94452 | 0(600)      |
| 1 | 5 | 12 | 8 | 1.58610 | 58.11102 | 0(1700)     |
| 0 | 2 | 39 | 4 | 1.57926 | 58.38691 | 100(1800)   |
| 1 | 3 | 31 | 8 | 1.57620 | 58.51105 | 0(1200)     |
| 2 | 2 | 16 | 8 | 1.57592 | 58.52250 | 0(3000)     |
| 1 | 5 | 13 | 8 | 1.57459 | 58.57657 | 0(6000)     |
| 1 | 1 | 37 | 8 | 1.57155 | 58.70116 | 0(3000)     |
| 2 | 0 | 22 | 4 | 1.56280 | 59.06216 | 0(14000000) |
| 0 | 4 | 31 | 4 | 1.56270 | 59.06652 | 0(4000000)  |
| 1 | 5 | 14 | 8 | 1.56245 | 59.07679 | 0(200)      |
| 2 | 2 | 17 | 8 | 1.56108 | 59.13387 | 0(500000)   |

|   |   |    |   |         |          |             |
|---|---|----|---|---------|----------|-------------|
| 0 | 0 | 42 | 2 | 1.55938 | 59.20454 | 0(10000000) |
| 1 | 5 | 15 | 8 | 1.54971 | 59.61116 | 0(300000)   |
| 1 | 3 | 32 | 8 | 1.54821 | 59.67498 | 0(300)      |
| 0 | 6 | 0  | 2 | 1.54804 | 59.68191 | 0(300000)   |
| 0 | 6 | 1  | 4 | 1.54761 | 59.70027 | 0(14000)    |
| 0 | 6 | 2  | 4 | 1.54632 | 59.75533 | 0(100000)   |
| 2 | 2 | 18 | 8 | 1.54578 | 59.77805 | 0(400000)   |
| 0 | 2 | 40 | 4 | 1.54419 | 59.84609 | 0(600000)   |
| 0 | 6 | 3  | 4 | 1.54417 | 59.84703 | 0(80000)    |
| 0 | 6 | 4  | 4 | 1.54117 | 59.97527 | 0(3000000)  |
| 1 | 1 | 38 | 8 | 1.53868 | 60.08250 | 0(4000000)  |
| 0 | 6 | 5  | 4 | 1.53735 | 60.13991 | 0(7000000)  |
| 1 | 5 | 16 | 8 | 1.53644 | 60.17917 | 0(100000)   |
| 0 | 4 | 32 | 4 | 1.53540 | 60.22382 | 0(6000000)  |
| 0 | 6 | 6  | 4 | 1.53271 | 60.34076 | 0(600000)   |

---

**hkl Phase - 1 Pawley method**

|                    |                                  |
|--------------------|----------------------------------|
| Phase name         | Al <sub>2</sub> TiO <sub>5</sub> |
| R-Bragg            | 1.117                            |
| Spacegroup         | Cmcm                             |
| Lattice parameters |                                  |
| a (Å)              | 3.605(6)                         |
| b (Å)              | 9.106(14)                        |
| c (Å)              | 9.493(7)                         |

| h | k | l | m | d       | Th2      | I          |
|---|---|---|---|---------|----------|------------|
| 0 | 0 | 2 | 2 | 4.74656 | 18.67916 | 0(5)       |
| 0 | 2 | 0 | 2 | 4.55290 | 19.48127 | 0(11)      |
| 0 | 2 | 1 | 4 | 4.10519 | 21.63021 | 2(6)       |
| 1 | 1 | 0 | 4 | 3.35192 | 26.57156 | 0(20)      |
| 0 | 2 | 2 | 4 | 3.28572 | 27.11703 | 9(110)     |
| 1 | 1 | 1 | 8 | 3.16068 | 28.21156 | 60(20)     |
| 1 | 1 | 2 | 8 | 2.73803 | 32.67959 | 9(15)      |
| 0 | 2 | 3 | 4 | 2.59842 | 34.48890 | 4000(5000) |
| 0 | 0 | 4 | 2 | 2.37328 | 37.87918 | 0(50)      |
| 1 | 3 | 0 | 4 | 2.32189 | 38.75064 | 0(16000)   |
| 1 | 1 | 3 | 8 | 2.30100 | 39.11678 | 1(1200)    |
| 0 | 4 | 0 | 2 | 2.27645 | 39.55602 | 0(800)     |
| 1 | 3 | 1 | 8 | 2.25541 | 39.94070 | 0(190)     |
| 0 | 4 | 1 | 4 | 2.21369 | 40.72638 | 1000(4000) |
| 0 | 2 | 4 | 4 | 2.10452 | 42.94081 | 0(200)     |
| 1 | 3 | 2 | 8 | 2.08572 | 43.34747 | 0(1500)    |
| 0 | 4 | 2 | 4 | 2.05259 | 44.08330 | 70(130)    |
| 1 | 1 | 4 | 8 | 1.93693 | 46.86783 | 90(50)     |
| 1 | 3 | 3 | 8 | 1.87200 | 48.59610 | 600(500)   |
| 0 | 4 | 3 | 4 | 1.84794 | 49.27058 | 0(400)     |

|   |   |   |   |         |          |                 |
|---|---|---|---|---------|----------|-----------------|
| 2 | 0 | 0 | 2 | 1.80253 | 50.59819 | 0(200)          |
| 0 | 2 | 5 | 4 | 1.75236 | 52.15385 | 0(800)          |
| 2 | 0 | 2 | 4 | 1.68511 | 54.40290 | 0(400)          |
| 2 | 2 | 0 | 4 | 1.67596 | 54.72472 | 0(4000)         |
| 1 | 3 | 4 | 8 | 1.65970 | 55.30660 | 0(14000)        |
| 1 | 1 | 5 | 8 | 1.65201 | 55.58597 | 0(300000)       |
| 2 | 2 | 1 | 8 | 1.65044 | 55.64372 | 0(500000)       |
| 0 | 4 | 4 | 4 | 1.64286 | 55.92279 | 0(80000)        |
| 1 | 5 | 0 | 4 | 1.62552 | 56.57261 | 0(1000)         |
| 1 | 5 | 1 | 8 | 1.60220 | 57.47201 | 0(7000)         |
| 0 | 0 | 6 | 2 | 1.58219 | 58.26836 | 0(400)          |
| 2 | 2 | 2 | 8 | 1.58034 | 58.34304 | 3(500)          |
| 1 | 5 | 2 | 8 | 1.53784 | 60.11857 | 0(2000000)      |
| 0 | 6 | 0 | 2 | 1.51763 | 61.00356 | 0(1600000)      |
| 0 | 6 | 1 | 4 | 1.49860 | 61.86264 | 300000(1900000) |

---

|                               |                                                 |
|-------------------------------|-------------------------------------------------|
| Phase name                    | Al <sub>6</sub> Ti <sub>2</sub> O <sub>13</sub> |
| R-Bragg                       | 1.538                                           |
| Spacegroup                    | Cm2m                                            |
| Cell Volume (Å <sup>3</sup> ) | 432.0(12)                                       |
| Lattice parameters            |                                                 |
| a (Å)                         | 3.709(3)                                        |
| b (Å)                         | 9.30(2)                                         |
| c (Å)                         | 12.519(16)                                      |

| h | k | l | m | d       | Th2      | I         |
|---|---|---|---|---------|----------|-----------|
| 0 | 0 | 2 | 2 | 6.25967 | 14.13716 | 4.2(18)   |
| 0 | 2 | 0 | 2 | 4.65101 | 19.06644 | 0(200)    |
| 0 | 2 | 1 | 4 | 4.35987 | 20.35279 | 3(9)      |
| 0 | 0 | 3 | 2 | 4.17311 | 21.27398 | 4(9)      |
| 0 | 2 | 2 | 4 | 3.73329 | 23.81496 | 11(5)     |
| 1 | 1 | 0 | 4 | 3.44540 | 25.83794 | 5(7)      |
| 1 | 1 | 1 | 8 | 3.32190 | 26.81614 | 20(30)    |
| 0 | 0 | 4 | 2 | 3.12984 | 28.49542 | 40(40)    |
| 0 | 2 | 3 | 4 | 3.10610 | 28.71785 | 140(20)   |
| 1 | 1 | 2 | 8 | 3.01839 | 29.57108 | 40(90)    |
| 1 | 1 | 3 | 8 | 2.65688 | 33.70699 | 1530(110) |
| 0 | 2 | 4 | 4 | 2.59664 | 34.51320 | 0(6000)   |
| 0 | 0 | 5 | 2 | 2.50387 | 35.83451 | 0(400)    |
| 1 | 3 | 0 | 4 | 2.37895 | 37.78540 | 30(50)    |
| 1 | 3 | 1 | 8 | 2.33713 | 38.48790 | 3(10000)  |
| 0 | 4 | 0 | 2 | 2.32551 | 38.68797 | 0(5000)   |
| 1 | 1 | 4 | 8 | 2.31668 | 38.84134 | 0(30000)  |
| 0 | 4 | 1 | 4 | 2.28640 | 39.37683 | 0(8000)   |
| 1 | 3 | 2 | 8 | 2.22377 | 40.53360 | 0(1100)   |
| 0 | 2 | 5 | 4 | 2.20469 | 40.90015 | 1200(600) |
| 0 | 4 | 2 | 4 | 2.17993 | 41.38575 | 0(3000)   |



|   |   |   |   |         |          |            |
|---|---|---|---|---------|----------|------------|
| 0 | 0 | 6 | 2 | 2.08656 | 43.32910 | 0(500)     |
| 1 | 3 | 3 | 8 | 2.06672 | 43.76629 | 140(70)    |
| 0 | 4 | 3 | 4 | 2.03139 | 44.56802 | 300(300)   |
| 1 | 1 | 5 | 8 | 2.02549 | 44.70470 | 200(1600)  |
| 0 | 2 | 6 | 4 | 1.90376 | 47.73468 | 510(130)   |
| 1 | 3 | 4 | 8 | 1.89395 | 47.99723 | 0(600)     |
| 0 | 4 | 4 | 4 | 1.86665 | 48.74458 | 1300(1000) |
| 2 | 0 | 0 | 2 | 1.85461 | 49.08179 | 100(300)   |
| 2 | 0 | 1 | 4 | 1.83459 | 49.65343 | 0(1000)    |
| 0 | 0 | 7 | 2 | 1.78848 | 51.02404 | 0(900)     |
| 1 | 1 | 6 | 8 | 1.78478 | 51.13742 | 0(3000)    |
| 2 | 0 | 2 | 4 | 1.77820 | 51.34021 | 0(700)     |
| 1 | 3 | 5 | 8 | 1.72464 | 53.05683 | 0(1300)    |
| 2 | 2 | 0 | 4 | 1.72270 | 53.12141 | 8(3000)    |
| 2 | 2 | 1 | 8 | 1.70662 | 53.66183 | 0(4000)    |
| 0 | 4 | 5 | 4 | 1.70395 | 53.75260 | 0(30000)   |
| 2 | 0 | 3 | 4 | 1.69478 | 54.06712 | 3(3000)    |
| 0 | 2 | 7 | 4 | 1.66931 | 54.96095 | 0(14000)   |
| 1 | 5 | 0 | 4 | 1.66296 | 55.18888 | 0(30000)   |
| 2 | 2 | 2 | 8 | 1.66095 | 55.26126 | 0(110000)  |
| 1 | 5 | 1 | 8 | 1.64848 | 55.71558 | 0(200000)  |
| 1 | 5 | 2 | 8 | 1.60721 | 57.27641 | 0(800)     |
| 2 | 0 | 4 | 4 | 1.59553 | 57.73498 | 0(7000)    |
| 2 | 2 | 3 | 8 | 1.59236 | 57.86084 | 0(1400)    |
| 1 | 1 | 7 | 8 | 1.58736 | 58.06042 | 0(2000)    |
| 1 | 3 | 6 | 8 | 1.56867 | 58.81952 | 0(3000)    |
| 0 | 0 | 8 | 2 | 1.56492 | 58.97440 | 300(1800)  |
| 0 | 4 | 6 | 4 | 1.55305 | 59.47023 | 0(9000)    |
| 0 | 6 | 0 | 2 | 1.55034 | 59.58471 | 0(30000)   |
| 1 | 5 | 3 | 8 | 1.54482 | 59.81929 | 0(1400000) |
| 0 | 6 | 1 | 4 | 1.53859 | 60.08648 | 0(3000000) |

---

### hkl Phase - 3 Pawley method

|                                |                                          |
|--------------------------------|------------------------------------------|
| Phase name                     | $\text{Al}_{16}\text{Ti}_5\text{O}_{34}$ |
| R-Bragg                        | 1.389                                    |
| Spacegroup                     | Cmcm                                     |
| Cell Volume ( $\text{\AA}^3$ ) | 2220(3)                                  |
| Lattice parameters             |                                          |
| a ( $\text{\AA}$ )             | 3.658(2)                                 |
| b ( $\text{\AA}$ )             | 9.287(10)                                |
| c ( $\text{\AA}$ )             | 65.36(4)                                 |

| h | k | l  | m | d       | Th2      | I       |
|---|---|----|---|---------|----------|---------|
| 0 | 0 | 8  | 2 | 8.16941 | 10.82097 | 0.0(12) |
| 0 | 0 | 10 | 2 | 6.53553 | 13.53759 | 1.1(14) |
| 0 | 0 | 12 | 2 | 5.44627 | 16.26188 | 1.9(19) |
| 0 | 0 | 14 | 2 | 4.66823 | 18.99545 | 50(70)  |
| 0 | 2 | 0  | 2 | 4.64347 | 19.09769 | 30(120) |
| 0 | 2 | 1  | 4 | 4.63180 | 19.14628 | 0(30)   |
| 0 | 2 | 2  | 4 | 4.59729 | 19.29136 | 0(12)   |
| 0 | 2 | 3  | 4 | 4.54145 | 19.53086 | 0(11)   |
| 0 | 2 | 4  | 4 | 4.46659 | 19.86148 | 0(3)    |
| 0 | 2 | 5  | 4 | 4.37557 | 20.27896 | 0(8)    |
| 0 | 2 | 6  | 4 | 4.27153 | 20.77831 | 1(3)    |
| 0 | 2 | 7  | 4 | 4.15765 | 21.35404 | 0(8)    |
| 0 | 0 | 16 | 2 | 4.08471 | 21.73997 | 1(6)    |
| 0 | 2 | 8  | 4 | 4.03692 | 22.00048 | 1(4)    |
| 0 | 2 | 9  | 4 | 3.91205 | 22.71196 | 2(4)    |
| 0 | 2 | 10 | 4 | 3.78532 | 23.48295 | 7(4)    |
| 0 | 2 | 11 | 4 | 3.65864 | 24.30823 | 6(5)    |
| 0 | 0 | 18 | 2 | 3.63085 | 24.49719 | 4(5)    |

|   |   |    |   |         |          |           |
|---|---|----|---|---------|----------|-----------|
| 0 | 2 | 12 | 4 | 3.53351 | 25.18292 | 8(5)      |
| 0 | 2 | 13 | 4 | 3.41107 | 26.10254 | 0(60)     |
| 1 | 1 | 0  | 4 | 3.40378 | 26.15941 | 0(170)    |
| 1 | 1 | 1  | 8 | 3.39918 | 26.19550 | 0(150)    |
| 1 | 1 | 2  | 8 | 3.38547 | 26.30347 | 40(40)    |
| 1 | 1 | 3  | 8 | 3.36298 | 26.48253 | 80(30)    |
| 1 | 1 | 4  | 8 | 3.33224 | 26.73133 | 5(30)     |
| 1 | 1 | 5  | 8 | 3.29393 | 27.04811 | 2(400)    |
| 0 | 2 | 14 | 4 | 3.29215 | 27.06303 | 0(500)    |
| 0 | 0 | 20 | 2 | 3.26776 | 27.26888 | 4(14)     |
| 1 | 1 | 6  | 8 | 3.24886 | 27.43068 | 21(10)    |
| 1 | 1 | 7  | 8 | 3.19790 | 27.87656 | 29(9)     |
| 0 | 2 | 15 | 4 | 3.17732 | 28.06075 | 13(19)    |
| 1 | 1 | 8  | 8 | 3.14197 | 28.38302 | 20(30)    |
| 1 | 1 | 9  | 8 | 3.08201 | 28.94718 | 100(20)   |
| 0 | 2 | 16 | 4 | 3.06695 | 29.09243 | 200(20)   |
| 1 | 1 | 10 | 8 | 3.01889 | 29.56605 | 0(70)     |
| 0 | 0 | 22 | 2 | 2.97069 | 30.05693 | 10(20)    |
| 0 | 2 | 17 | 4 | 2.96124 | 30.15519 | 0(30)     |
| 1 | 1 | 11 | 8 | 2.95345 | 30.23664 | 30(20)    |
| 1 | 1 | 12 | 8 | 2.88644 | 30.95598 | 26(9)     |
| 0 | 2 | 18 | 4 | 2.86026 | 31.24648 | 38(9)     |
| 1 | 1 | 13 | 8 | 2.81853 | 31.72117 | 26(9)     |
| 0 | 2 | 19 | 4 | 2.76400 | 32.36406 | 22(13)    |
| 1 | 1 | 14 | 8 | 2.75032 | 32.52943 | 0(17)     |
| 0 | 0 | 24 | 2 | 2.72314 | 32.86333 | 0(13)     |
| 1 | 1 | 15 | 8 | 2.68231 | 33.37811 | 0(30)     |
| 0 | 2 | 20 | 4 | 2.67236 | 33.50597 | 0(60)     |
| 1 | 1 | 16 | 8 | 2.61490 | 34.26471 | 1600(300) |
| 0 | 2 | 21 | 4 | 2.58522 | 34.67049 | 3700(900) |
| 1 | 1 | 17 | 8 | 2.54845 | 35.18689 | 0(30)     |

|   |   |    |   |         |          |          |
|---|---|----|---|---------|----------|----------|
| 0 | 0 | 26 | 2 | 2.51366 | 35.69014 | 0(70)    |
| 0 | 2 | 22 | 4 | 2.50241 | 35.85614 | 0(300)   |
| 1 | 1 | 18 | 8 | 2.48323 | 36.14251 | 20(20)   |
| 0 | 2 | 23 | 4 | 2.42373 | 37.06163 | 40(30)   |
| 1 | 1 | 19 | 8 | 2.41946 | 37.12955 | 5(30)    |
| 1 | 3 | 0  | 4 | 2.36314 | 38.04796 | 0(800)   |
| 1 | 3 | 1  | 8 | 2.36160 | 38.07378 | 0(1300)  |
| 1 | 1 | 20 | 8 | 2.35728 | 38.14621 | 0(9000)  |
| 1 | 3 | 2  | 8 | 2.35698 | 38.15116 | 0(9000)  |
| 1 | 3 | 3  | 8 | 2.34936 | 38.27982 | 0(6000)  |
| 0 | 2 | 24 | 4 | 2.34900 | 38.28585 | 0(6000)  |
| 1 | 3 | 4  | 8 | 2.33880 | 38.45934 | 0(5000)  |
| 0 | 0 | 28 | 2 | 2.33412 | 38.53959 | 0(3000)  |
| 1 | 3 | 5  | 8 | 2.32544 | 38.68911 | 0(5000)  |
| 0 | 4 | 0  | 2 | 2.32174 | 38.75330 | 0(30000) |
| 0 | 4 | 1  | 4 | 2.32027 | 38.77872 | 0(6000)  |
| 0 | 4 | 2  | 4 | 2.31590 | 38.85491 | 6(15000) |
| 1 | 3 | 6  | 8 | 2.30942 | 38.96839 | 0(4000)  |
| 0 | 4 | 3  | 4 | 2.30866 | 38.98161 | 0(2000)  |
| 0 | 4 | 4  | 4 | 2.29864 | 39.15841 | 0(2000)  |
| 1 | 1 | 21 | 8 | 2.29682 | 39.19080 | 0(1700)  |
| 1 | 3 | 7  | 8 | 2.29090 | 39.29629 | 0(1400)  |
| 0 | 4 | 5  | 4 | 2.28595 | 39.38474 | 0(5000)  |
| 0 | 2 | 25 | 4 | 2.27801 | 39.52783 | 9(1500)  |
| 0 | 4 | 6  | 4 | 2.27073 | 39.65990 | 0(1100)  |
| 1 | 3 | 8  | 8 | 2.27007 | 39.67181 | 0(1000)  |
| 0 | 4 | 7  | 4 | 2.25312 | 39.98306 | 0(200)   |
| 1 | 3 | 9  | 8 | 2.24714 | 40.09385 | 0(120)   |
| 1 | 1 | 22 | 8 | 2.23816 | 40.26183 | 0(110)   |
| 0 | 4 | 8  | 4 | 2.23330 | 40.35324 | 0(200)   |
| 1 | 3 | 10 | 8 | 2.22232 | 40.56121 | 800(900) |

|   |   |    |   |         |          |           |
|---|---|----|---|---------|----------|-----------|
| 0 | 4 | 9  | 4 | 2.21146 | 40.76941 | 0(14000)  |
| 0 | 2 | 26 | 4 | 2.21055 | 40.78676 | 0(10000)  |
| 1 | 3 | 11 | 8 | 2.19583 | 41.07265 | 180(180)  |
| 0 | 4 | 10 | 4 | 2.18779 | 41.23043 | 100(300)  |
| 1 | 1 | 23 | 8 | 2.18134 | 41.35793 | 0(900)    |
| 0 | 0 | 30 | 2 | 2.17851 | 41.41404 | 0(1400)   |
| 1 | 3 | 12 | 8 | 2.16786 | 41.62684 | 0(200)    |
| 0 | 4 | 11 | 4 | 2.16249 | 41.73510 | 230(90)   |
| 0 | 2 | 27 | 4 | 2.14644 | 42.06196 | 190(50)   |
| 1 | 3 | 13 | 8 | 2.13865 | 42.22247 | 0(110)    |
| 0 | 4 | 12 | 4 | 2.13577 | 42.28219 | 0(100)    |
| 1 | 1 | 24 | 8 | 2.12638 | 42.47787 | 120(40)   |
| 1 | 3 | 14 | 8 | 2.10839 | 42.85818 | 100(1300) |
| 0 | 4 | 13 | 4 | 2.10781 | 42.87041 | 5(1500)   |
| 0 | 2 | 28 | 4 | 2.08547 | 43.35285 | 0(2000)   |
| 0 | 4 | 14 | 4 | 2.07882 | 43.49846 | 0(800)    |
| 1 | 3 | 15 | 8 | 2.07727 | 43.53262 | 0(700)    |
| 1 | 1 | 25 | 8 | 2.07329 | 43.62056 | 0(190)    |
| 0 | 4 | 15 | 4 | 2.04898 | 44.16505 | 0(300)    |
| 1 | 3 | 16 | 8 | 2.04549 | 44.24445 | 0(400)    |
| 0 | 0 | 32 | 2 | 2.04235 | 44.31601 | 200(200)  |
| 0 | 2 | 29 | 4 | 2.02746 | 44.65894 | 0(1000)   |
| 1 | 1 | 26 | 8 | 2.02205 | 44.78503 | 0(700)    |
| 0 | 4 | 16 | 4 | 2.01846 | 44.86891 | 0(200)    |
| 1 | 3 | 17 | 8 | 2.01321 | 44.99237 | 120(100)  |
| 0 | 4 | 17 | 4 | 1.98742 | 45.60875 | 30(40)    |
| 1 | 3 | 18 | 8 | 1.98059 | 45.77509 | 7(50)     |
| 1 | 1 | 27 | 8 | 1.97263 | 45.97042 | 0(500)    |
| 0 | 2 | 30 | 4 | 1.97224 | 45.97987 | 0(500)    |
| 0 | 4 | 18 | 4 | 1.95602 | 46.38334 | 30(30)    |
| 1 | 3 | 19 | 8 | 1.94777 | 46.59137 | 20(40)    |

|   |   |    |   |         |          |          |
|---|---|----|---|---------|----------|----------|
| 1 | 1 | 28 | 8 | 1.92499 | 47.17599 | 0(4000)  |
| 0 | 4 | 19 | 4 | 1.92439 | 47.19150 | 0(5000)  |
| 0 | 0 | 34 | 2 | 1.92221 | 47.24823 | 0(2000)  |
| 0 | 2 | 31 | 4 | 1.91965 | 47.31532 | 0(900)   |
| 1 | 3 | 20 | 8 | 1.91489 | 47.44004 | 120(190) |
| 0 | 4 | 20 | 4 | 1.89266 | 48.03206 | 200(400) |
| 1 | 3 | 21 | 8 | 1.88205 | 48.31997 | 220(160) |
| 1 | 1 | 29 | 8 | 1.87909 | 48.40108 | 200(200) |
| 0 | 2 | 32 | 4 | 1.86951 | 48.66507 | 0(1100)  |
| 0 | 4 | 21 | 4 | 1.86094 | 48.90394 | 500(400) |
| 1 | 3 | 22 | 8 | 1.84937 | 49.23007 | 0(500)   |
| 1 | 1 | 30 | 8 | 1.83487 | 49.64513 | 0(700)   |
| 0 | 4 | 22 | 4 | 1.82932 | 49.80609 | 4(7000)  |
| 2 | 0 | 0  | 2 | 1.82918 | 49.81021 | 0(7000)  |
| 2 | 0 | 2  | 4 | 1.82632 | 49.89352 | 8(400)   |
| 0 | 2 | 33 | 4 | 1.82169 | 50.02896 | 0(200)   |
| 2 | 0 | 4  | 4 | 1.81782 | 50.14281 | 4(1300)  |
| 1 | 3 | 23 | 8 | 1.81692 | 50.16934 | 4(1700)  |
| 0 | 0 | 36 | 2 | 1.81542 | 50.21366 | 4(600)   |
| 2 | 0 | 6  | 4 | 1.80392 | 50.55632 | 1(300)   |
| 0 | 4 | 23 | 4 | 1.79790 | 50.73752 | 10(120)  |
| 1 | 1 | 31 | 8 | 1.79229 | 50.90767 | 0(200)   |
| 2 | 0 | 8  | 4 | 1.78498 | 51.13113 | 0(5000)  |
| 1 | 3 | 24 | 8 | 1.78480 | 51.13684 | 2(6000)  |
| 0 | 2 | 34 | 4 | 1.77605 | 51.40690 | 0(300)   |
| 0 | 4 | 24 | 4 | 1.76676 | 51.69732 | 0(160)   |
| 2 | 0 | 10 | 4 | 1.76149 | 51.86343 | 0(300)   |
| 1 | 3 | 25 | 8 | 1.75305 | 52.13169 | 0(700)   |
| 1 | 1 | 32 | 8 | 1.75128 | 52.18830 | 0(400)   |
| 0 | 4 | 25 | 4 | 1.73595 | 52.68462 | 0(500)   |
| 2 | 0 | 12 | 4 | 1.73399 | 52.74861 | 0(900)   |

|   |   |    |   |         |          |            |
|---|---|----|---|---------|----------|------------|
| 0 | 2 | 35 | 4 | 1.73246 | 52.79887 | 0(500)     |
| 1 | 3 | 26 | 8 | 1.72175 | 53.15309 | 0(1500)    |
| 0 | 0 | 38 | 2 | 1.71988 | 53.21549 | 0(400)     |
| 1 | 1 | 33 | 8 | 1.71179 | 53.48671 | 100(600)   |
| 0 | 4 | 26 | 4 | 1.70554 | 53.69864 | 5(5000)    |
| 2 | 0 | 14 | 4 | 1.70310 | 53.78152 | 0(20000)   |
| 2 | 2 | 0  | 4 | 1.70189 | 53.82286 | 0(30000)   |
| 2 | 2 | 1  | 8 | 1.70132 | 53.84258 | 0(20000)   |
| 2 | 2 | 2  | 8 | 1.69959 | 53.90171 | 0(2000)    |
| 2 | 2 | 3  | 8 | 1.69672 | 54.00015 | 0(2000)    |
| 2 | 2 | 4  | 8 | 1.69273 | 54.13777 | 0(3000)    |
| 1 | 3 | 27 | 8 | 1.69093 | 54.20028 | 0(20000)   |
| 0 | 2 | 36 | 4 | 1.69080 | 54.20488 | 0(20000)   |
| 2 | 2 | 5  | 8 | 1.68765 | 54.31435 | 9(600)     |
| 2 | 2 | 6  | 8 | 1.68149 | 54.52965 | 0(400)     |
| 0 | 4 | 27 | 4 | 1.67557 | 54.73864 | 0(8000)    |
| 2 | 2 | 7  | 8 | 1.67430 | 54.78335 | 0(7000)    |
| 1 | 1 | 34 | 8 | 1.67376 | 54.80267 | 8(6000)    |
| 2 | 0 | 16 | 4 | 1.66943 | 54.95666 | 0(8000)    |
| 2 | 2 | 8  | 8 | 1.66612 | 55.07510 | 1(2000)    |
| 1 | 3 | 28 | 8 | 1.66064 | 55.27258 | 0(70000)   |
| 2 | 2 | 9  | 8 | 1.65699 | 55.40450 | 0(90000)   |
| 1 | 5 | 0  | 4 | 1.65616 | 55.43481 | 0(200000)  |
| 1 | 5 | 1  | 8 | 1.65563 | 55.45414 | 0(190000)  |
| 1 | 5 | 2  | 8 | 1.65404 | 55.51210 | 1(50000)   |
| 1 | 5 | 3  | 8 | 1.65139 | 55.60861 | 0(1600000) |
| 0 | 2 | 37 | 4 | 1.65095 | 55.62501 | 0(1900000) |
| 1 | 5 | 4  | 8 | 1.64772 | 55.74353 | 0(70000)   |
| 2 | 2 | 10 | 8 | 1.64697 | 55.77112 | 2(90000)   |
| 0 | 4 | 28 | 4 | 1.64608 | 55.80396 | 0(60000)   |
| 1 | 5 | 5  | 8 | 1.64302 | 55.91669 | 0(120000)  |

|   |   |    |   |         |          |          |
|---|---|----|---|---------|----------|----------|
| 1 | 5 | 6  | 8 | 1.63734 | 56.12786 | 0(60000) |
| 1 | 1 | 35 | 8 | 1.63712 | 56.13599 | 0(80000) |
| 2 | 2 | 11 | 8 | 1.63609 | 56.17448 | 0(20000) |
| 0 | 0 | 40 | 2 | 1.63388 | 56.25726 | 4(20000) |
| 2 | 0 | 18 | 4 | 1.63358 | 56.26840 | 0(19000) |
| 1 | 3 | 29 | 8 | 1.63090 | 56.36940 | 0(12000) |
| 1 | 5 | 7  | 8 | 1.63070 | 56.37674 | 0(10000) |
| 2 | 2 | 12 | 8 | 1.62443 | 56.61409 | 7(1400)  |
| 1 | 5 | 8  | 8 | 1.62314 | 56.66302 | 0(1000)  |
| 0 | 4 | 29 | 4 | 1.61710 | 56.89400 | 0(500)   |
| 1 | 5 | 9  | 8 | 1.61470 | 56.98634 | 5(500)   |
| 0 | 2 | 38 | 4 | 1.61280 | 57.05941 | 0(1200)  |
| 2 | 2 | 13 | 8 | 1.61203 | 57.08941 | 7(1100)  |
| 1 | 5 | 10 | 8 | 1.60541 | 57.34630 | 0(1000)  |
| 1 | 1 | 36 | 8 | 1.60183 | 57.48656 | 3(50000) |
| 1 | 3 | 30 | 8 | 1.60174 | 57.49018 | 2(50000) |
| 2 | 2 | 14 | 8 | 1.59895 | 57.59991 | 1(1300)  |
| 2 | 0 | 20 | 4 | 1.59613 | 57.71116 | 0(1600)  |
| 1 | 5 | 11 | 8 | 1.59534 | 57.74247 | 0(4000)  |
| 0 | 4 | 30 | 4 | 1.58866 | 58.00823 | 1(1000)  |
| 2 | 2 | 15 | 8 | 1.58525 | 58.14503 | 0(2000)  |
| 1 | 5 | 12 | 8 | 1.58452 | 58.17441 | 0(1600)  |
| 0 | 2 | 39 | 4 | 1.57627 | 58.50824 | 0(600)   |
| 1 | 3 | 31 | 8 | 1.57318 | 58.63446 | 0(5000)  |
| 1 | 5 | 13 | 8 | 1.57300 | 58.64162 | 0(6000)  |
| 2 | 2 | 16 | 8 | 1.57099 | 58.72421 | 0(1100)  |
| 1 | 1 | 37 | 8 | 1.56782 | 58.85434 | 2(1400)  |
| 1 | 5 | 14 | 8 | 1.56084 | 59.14361 | 0(15000) |
| 0 | 4 | 31 | 4 | 1.56078 | 59.14618 | 0(15000) |
| 2 | 0 | 22 | 4 | 1.55759 | 59.27956 | 0(4000)  |
| 2 | 2 | 17 | 8 | 1.55622 | 59.33687 | 0(30000) |



|   |   |    |   |         |          |             |
|---|---|----|---|---------|----------|-------------|
| 0 | 0 | 42 | 2 | 1.55608 | 59.34283 | 0(30000)    |
| 1 | 5 | 15 | 8 | 1.54809 | 59.67988 | 0(1000000)  |
| 0 | 6 | 0  | 2 | 1.54782 | 59.69128 | 0(2000000)  |
| 0 | 6 | 1  | 4 | 1.54739 | 59.70972 | 0(1400000)  |
| 0 | 6 | 2  | 4 | 1.54609 | 59.76501 | 0(500000)   |
| 1 | 3 | 32 | 8 | 1.54523 | 59.80181 | 0(700000)   |
| 0 | 6 | 3  | 4 | 1.54393 | 59.85710 | 0(400000)   |
| 0 | 2 | 40 | 4 | 1.54125 | 59.97175 | 0(3000000)  |
| 2 | 2 | 18 | 8 | 1.54100 | 59.98245 | 0(900000)   |
| 0 | 6 | 4  | 4 | 1.54093 | 59.98587 | 0(2000000)  |
| 0 | 6 | 5  | 4 | 1.53708 | 60.15119 | 0(2000000)  |
| 1 | 1 | 38 | 8 | 1.53505 | 60.23935 | 0(20000000) |
| 1 | 5 | 16 | 8 | 1.53480 | 60.24991 | 0(20000000) |
| 0 | 4 | 32 | 4 | 1.53348 | 60.30743 | 0(3000000)  |
| 0 | 6 | 6  | 4 | 1.53243 | 60.35287 | 0(1900000)  |
| 0 | 6 | 7  | 4 | 1.52698 | 60.59071 | 0(3000000)  |

---
